# Supplementary material for: A reduced graphene oxide-β-cyclodextrin nanocomposite-based electrode for electrochemical detection of curcumin
Source: PubMed Central journal article supplement (PMC8695096; doi:10.1039/d0ra10701h), 2021-02-18
Supplement: RA-011-D0RA10701H-s001.pdf [file RA-011-D0RA10701H-s001.pdf]

## Reduced Graphene Oxide- $\beta$ -Cyclodextrin Nanocomposite-based Electrode for Electrochemical detection of Curcumin

Behzad Mirzaei<sup>a</sup>, Ali Zarrabi<sup>a,b\*</sup>, Abdollah Noorbakhsh<sup>c</sup>, Abbas Amini<sup>d,e</sup>, Pooyan Makvandi<sup>f,\*</sup>

<sup>a</sup> Department of Biotechnology, Faculty of <sup>Advanced</sup> Sciences and Technologies,  
University of Isfahan, Isfahan, Iran

<sup>b</sup> Sabanci University, Nanotechnology Research and Application Center (SUNUM),  
Tuzla, 34956 Istanbul, Turkey

<sup>c</sup> Department of Nanotechnology Engineering, Faculty of Advanced Sciences and  
Technologies, University of Isfahan, Isfahan, Iran

<sup>d</sup> Centre for Infrastructure Engineering, Western Sydney University, Penrith 2751,  
NSW, Australia

<sup>e</sup> Department of Mechanical Engineering, Australian College of Kuwait, Mishref,  
Kuwait

<sup>f</sup> Chemistry Department, Faculty of Science, Shahid Chamran University of Ahvaz,  
Ahvaz 6153753843, Iran

### \*Corresponding authors

E-mails: [alizarrabi@sabanciuniv.edu](mailto:alizarrabi@sabanciuniv.edu) (A. Zarrabi), [Pooyanmakvandi@gmail.com](mailto:Pooyanmakvandi@gmail.com) (P. Makvandi)

---

Table S-1. Factors and their level values used for Taguchi design.

| parameter                                           | Code | Level 1 | Level 2 | Level 3 |
|-----------------------------------------------------|------|---------|---------|---------|
| Electrolyte pH                                      | A    | 7       | 8       | -       |
| Accumulation time (min)                             | B    | 30      | 45      | 60      |
| $\beta$ -CD-rGO concentration (g ml <sup>-1</sup> ) | C    | 3       | 4       | 5       |
| $\beta$ -CD to GO ratio                             | D    | 0.1     | 0.25    | 0.5     |

Table S-2. The basic Taguchi L<sub>18</sub> orthogonal arrays.

| Run | Control factor and levels |   |   |   | Response |
|-----|---------------------------|---|---|---|----------|
|     | A                         | B | C | D | factor   |
| 1   | 1                         | 1 | 1 | 1 | 101      |
| 2   | 1                         | 1 | 2 | 2 | 92       |
| 3   | 1                         | 1 | 3 | 3 | 11       |
| 4   | 1                         | 2 | 1 | 1 | 111      |
| 5   | 1                         | 2 | 2 | 2 | 112      |
| 6   | 1                         | 2 | 3 | 3 | 41       |
| 7   | 1                         | 3 | 1 | 2 | 111      |
| 8   | 1                         | 3 | 2 | 3 | 10       |
| 9   | 1                         | 3 | 3 | 1 | 83       |
| 10  | 2                         | 1 | 1 | 3 | 103      |
| 11  | 2                         | 1 | 2 | 1 | 94       |
| 12  | 2                         | 1 | 3 | 2 | 20       |
| 13  | 2                         | 2 | 1 | 2 | 46       |
| 14  | 2                         | 2 | 2 | 3 | 82       |
| 15  | 2                         | 2 | 3 | 1 | 50       |
| 16  | 2                         | 3 | 1 | 3 | 94       |
| 17  | 2                         | 3 | 2 | 1 | 110      |
| 18  | 2                         | 3 | 3 | 2 | 28       |
